# Supplementary material for: Identification of Genes Directly Involved in Shell Formation and Their Functions in Pearl Oyster, Pinctada fucata
Source: PubMed Central journal article supplement (PMC3128620; doi:10.1371/journal.pone.0021860), 2011-07-01

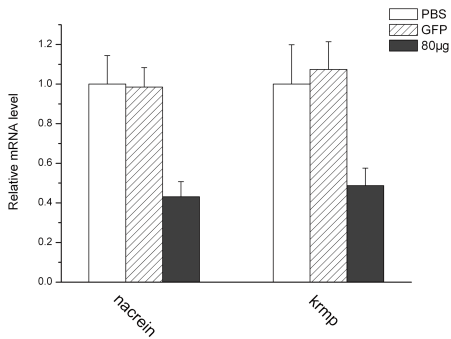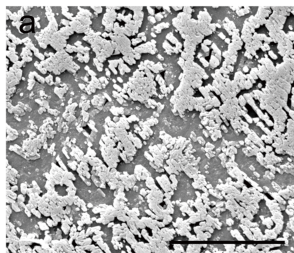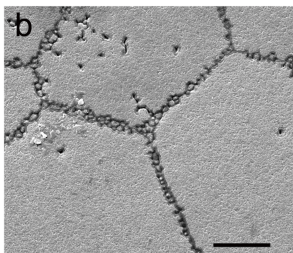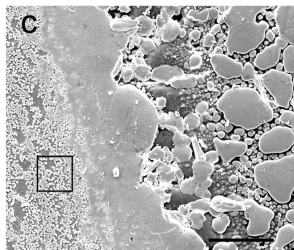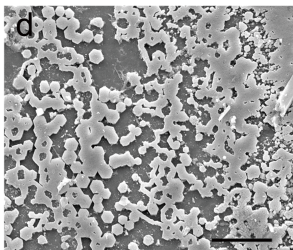

Supplement: pone.0021860.s003.pdf [file pone.0021860.s003.pdf]
