# Supplementary material for: Identification of Genes Directly Involved in Shell Formation and Their Functions in Pearl Oyster, Pinctada fucata
Source: PubMed Central journal article supplement (PMC3128620; doi:10.1371/journal.pone.0021860), 2011-07-01
Supplement: pone.0021860.s004.pdf [file pone.0021860.s004.pdf]

Table S1. Unigenes from the 3 SSH libraries with homology to biomineralization related genes.

Table S1. A. The unigenes with homology to biomineralization related genes in the D-T library.

| Unigene name                  | cDNA length (bp) | Homologous genes No. | E-value  | Homologous genes                                                                               |
|-------------------------------|------------------|----------------------|----------|------------------------------------------------------------------------------------------------|
| DT_Cluster10                  | 281              | gi 157114029         | 3.00E-16 | <b>Fibrinogen and Fibronectin</b><br>[ <i>Aedes aegypti</i> ]                                  |
| DT_Cluster160                 | 540              | gi 152205944         | 2.00E-15 | <b>Chitin synthase</b><br>[ <i>Pinctada fucata</i> ]                                           |
| DT_Cluster236                 | 154              | gi 31790121          | 2.00E-10 | <b>Nicotinic acetylcholine receptor alpha 9d</b><br>subunit<br>[ <i>Takifugu rubripes</i> ]    |
| DT_Cluster279                 | 286              | gi 241726688         | 1.00E-14 | peritrophic membrane <b>Chitin Binding Protein</b><br>putative<br>[ <i>Ixodes scapularis</i> ] |
| DT_Cluster527.<br>seq.Contig1 | 344              |                      |          |                                                                                                |
| DT_Cluster281                 | 269              | gi 241818165         | 3E-16    | <b>cysteine-rich</b> motor neuron, putative<br>[ <i>Ixodes scapularis</i> ]                    |
| DT_Cluster32                  | 320              | gi 194669778         | 8E-13    | <b>Collagen, type XII</b> , alpha 1 isoform 1<br>[ <i>Bos taurus</i> ]                         |
| DT_Cluster512.<br>seq.Contig1 |                  |                      |          |                                                                                                |
| DT_Cluster520.<br>seq.Contig1 | 716              | gi 198420236         | 3.00E-16 | <b>Collagen type VI</b> alpha 6<br>[ <i>Ciona intestinalis</i> ]                               |
| DT_Cluster343                 | 293              | gi 193999217         | 2.00E-47 | <b>Heat shock protein 70</b><br>[ <i>Pinctada fucata</i> ]                                     |
| DT_Cluster398                 | 261              | gi 93139010          | 4.00E-12 | <b>Ferritin</b><br>[ <i>Crassostrea ariakensis</i> ]                                           |
| DT_Cluster447                 | 307              | gi 126697410         | 2.00E-26 | sialic acid binding <b>lectin</b><br>[ <i>Haliotis discus discus</i> ]                         |
| DT_Cluster550.<br>seq.Contig1 | 291              | gi 154816107         | 7.00E-28 | C-type <b>lectin-1</b><br>[ <i>Crassostrea gigas</i> ]                                         |

Table S1. B. The unigenes with homology to biomineralization related genes in the U-D library.

| Unigene name                   | cDNA length (bp) | Homologous genes No. | E-value  | Homologous genes                                                                                |
|--------------------------------|------------------|----------------------|----------|-------------------------------------------------------------------------------------------------|
| UD_Cluster193.<br>seq.Contig1  | 476              | gi 32563747          | 2.00E-06 | <b>Collagen family member</b> (col-17)<br>[ <i>Caenorhabditis elegans</i> ]                     |
| UD_Cluster81.<br>seq.Singlet1  | 466              | gi 4519619           | 4.00E-09 | <b>Collagen</b> pro alpha-chain<br>[ <i>Haliotis discus</i> ]                                   |
| UD_Cluster67.<br>seq.Singlet1  | 291              | gi 154816107         | 1.00E-27 | <b>C-type lectin-1</b><br>[ <i>Crassostrea gigas</i> ]                                          |
| UD_Cluster109.<br>seq.Singlet1 | 324              | gi 33333949          | 3.00E-50 | <b>Ferritin-like protein</b><br>[ <i>Pinctada fucata</i> ]                                      |
| UD_Cluster121.<br>seq.Singlet1 | 461              | gi 156399584         | 1E-40    | <b>Calmodulin</b><br>[ <i>Metridium senile</i> ]                                                |
| UD_Cluster160.<br>seq.Contig1  | 216              | gi 126697410         | 3.00E-14 | sialic acid binding <b>lectin</b><br>[ <i>Haliotis discus discus</i> ]                          |
| UD_Cluster167.<br>seq.Singlet1 | 374              | gi 194217502         | 2.00E-06 | <b>calcium/calmodulin-dependent protein kinase kinase 1, alpha</b><br>[ <i>Equus caballus</i> ] |
| UD_Cluster187.<br>seq.Contig1  | 300              | gi 33325246          | 5.00E-06 | glycine-rich shell matrix protein ( <b>MSI7</b> )<br>[ <i>Pinctada fucata</i> ]                 |
| UD_Cluster80.<br>seq.Singlet1  | 472              | gi 196049300         | 5.00E-49 | <b>BMP5-8</b> [ <i>Saccostrea kegaki</i> ]                                                      |

Table S1. C. The unigenes with homology to biomineralization related genes in the J-U library.

| Unigene name                 | cDNA length (bp) | Homologous genes No. | E-value   | Homologous genes                                                                |
|------------------------------|------------------|----------------------|-----------|---------------------------------------------------------------------------------|
| IU_Cluster13                 | 216              | gi 126697410         | 3E-14     | <b>sialic acid binding lectin</b><br>[ <i>Haliotis discus discus</i> ]          |
| IU_Cluster16                 | 228              | gi 93139010          | 2.00E-06  | <b>ferritin</b><br>[ <i>Crassostrea ariakensis</i> ]                            |
| IU_Cluster36                 | 269              | gi 94471616          | 9.00E-41  | soma <b>ferritin</b><br>[ <i>Aplysia californica</i> ]                          |
| IU_Cluster64.<br>seq.Contig1 | 219              | gi 33325246          | 1E-110    | glycine-rich shell matrix protein ( <b>MSI7</b> )<br>[ <i>Pinctada fucata</i> ] |
| IU_Cluster7                  | 218              | gi 2204080           | 1.00E-111 | mRNA for insoluble protein ( <b>MSI60</b> )<br>[ <i>Pinctada fucata</i> ]       |
