# Supplementary material for: Identification of Genes Directly Involved in Shell Formation and Their Functions in Pearl Oyster, Pinctada fucata
Source: PubMed Central journal article supplement (PMC3128620; doi:10.1371/journal.pone.0021860), 2011-07-01
Supplement: pone.0021860.s005.pdf [file pone.0021860.s005.pdf]

**Data S1. Primers used for the test of the reduction of GAPDH abundance, in situ hybridization probe synthesis, double strand RNA synthesis and real-time quantitative PCR.**

**A. Primers used for the test of the reduction of GAPDH abundance**

**GAPDH:**

Forward: gapdhF: 5'-TCTGCTGATGCTCCTATGTTTG-3'

Reverse: gapdhR: 5'-TCTGGTATAACTTTGCCTACGG-3'

**B. Primers used for the in situ hybridization probe synthesis and RT-PCR**

**GAPDH:**

ingapdhF: 5'-TCTGCTGATGCTCCTATGTTTG-3'

ingapdhR: 5'-TCTGGTATAACTTTGCCTACGG-3'

**DT\_Cluster236:**

inD1F: 5'- GATTCAGGGGGAAGCAC- 3'

inD1R: 5'-ATACGACGCAAAGCCAC-3'

**DT\_Cluster252:**

inD2F: 5'-CGTCCCAGCCCTACTTTTTTA-3'

inD2R: 5'-TGACCCTCATTGGATGTTCT-3'

**DT\_Cluster524.seq.Contig1:**

inD3F: 5'-TGTCCAGTATAAGTCTGTCTGA-3'

inD3R: 5'-TTAAAAGGTCAAAGGTCAAG-3'

**UD\_Cluster94.seq.Singlet1:**

inUF: 5'-TTGTGAGTTGAACTGGTCGGGATC-3'

inUR: 5'-GAAGCAGTGGCAGCGGAAGC-3'

**IU\_Cluster32:**

inIF: 5'-TGACCCTCGCACTGGTATTG-3'

inIR: 5'-GATTGGCTCTGATTCGTCCT-3'

**C. Primers used for the double strand RNA synthesis, the underlined sequences are T7 promoters.**

**DT\_Cluster236:**

dsD1F: 5'- GCGTAATACGACTCACTATAGGGAGAGATTCAGGGGGAAGCAC- 3'

dsD1R: 5'-GCGTAATACGACTCACTATAGGGAGAAATACGACGCAAAGCCAC-3'

**DT\_Cluster252:**

dsD2F: 5'-GCGTAATACGACTCACTATAGGGAGACGTCCCAGCCCTACTTTTTTA-3'

dsD2R: 5'-GCGTAATACGACTCACTATAGGGAGATGACCCTCATTGGATGTTCT-3'

**DT\_Cluster524.seq.Contig1:**

dsD3F: 5'-GCGTAATACGACTCACTATAGGGAGATGTCCAGTATAAGTCTGTCTGA-3'  
dsD3R: 5'-GCGTAATACGACTCACTATAGGGAGATTAAAAGGTCAAAGGTCAAG-3'

**UD\_Cluster94.seq.Singlet1:**

dsUF: 5'-GCGTAATACGACTCACTATAGGGAGATTGTGAGTTGAACTGGTCGGGATC-3'  
dsUR: 5'-GCGTAATACGACTCACTATAGGGAGAGAAGCAGTGGCAGCGGAAGC-3'

**IU\_Cluster32:**

dsIF: 5'-GCGTAATACGACTCACTATAGGGAGATGACCCTCGCACTGGTATTG-3'  
dsIR: 5'-GCGTAATACGACTCACTATAGGGAGAGATTGGCTCTGATTTCGTCCT-3'

**krmp:**

dsKF: 5'-GCGTAATACGACTCACTATAGGGAGAAAGTTCGCCGCTGTTTTGGC-3'  
dsKR: 5'-GCGTAATACGACTCACTATAGGGAGACATATCCACCACTGGATCCTGG-3'

**nacrein:**

dsNF: 5'-GCGTAATACGACTCACTATAGGGAGAGGCTTTGGCGACGAACCGGA-3'  
dsNR: 5'-GCGTAATACGACTCACTATAGGGAGAACACGGGGGAGTGGTCAGGG-3'

**GFP:**

dsEF: 5'-GCGTAATACGACTCACTATAGGGAGAAATGGTGAGCAAGGGCGAGGAG-3'  
dsER: 5'-GCGTAATACGACTCACTATAGGGAGATTACTTGTACAGCTCGTCCATG-3'

**D. Primers used in the real-time quantitative PCR**

qPCR primers were designed using the BeaconDesigner7.7 software (PREMIER Biosoft International).

**DT\_Cluster236:**

qD1F: 5'-GAAGCACGAATCCTAGAG-3'  
qD1R: 5'-TTCACATACGACGCAAAG-3'

**DT\_Cluster252:**

qD2F: 5'-TCCGCAATATAATGAACAAGT-3'  
qD2R: 5'-TAGTAGACGCCACAATGAA-3'

**DT\_Cluster524.seq.Contig1:**

qD3F: 5'-GTTTGTCTGTTTGTCTGTCT-3'  
qD3R: 5'-CCCTATCACTTCCCATTCA-3'

**UD\_Cluster94.seq.Singlet1:**

qUF: 5'-AGGATGATGGATCAAGCAT-3'  
qUR: 5'-GTGGAGGAAGTAGCAGTAA-3'

**IU\_Cluster32:**

qIF: 5'-TAAAGGTCATAGGTCAAAGGT-3'  
qIR: 5'-GCTCTGATTTCGTCCTCTTA-3'

**krmp:**

qKF: 5'-AAGAAATGTCACCCTTGGGATTGG-3'

qKR: 5'-AATCATCGCCACCATATCCATCG-3'

**nacrein:**

qNF: 5'-GGCTTTGGCGACGAACCGGA-3'

qNR: 5'-ACACGGGGGAGTGGTCAGGG-3'

**pif:**

qPifF: 5'-TGCTGCCATCACGTGAGTATG-3'

qPifR: 5'-GACTTCCCTTTCTCACACTTCCA-3'

**pearlin:**

qPeF: 5'-TACTCATACTGCTGGATA-3'

qPeR: 5'-TATCATCATCGGTGTAAC-3'

**n19:**

qN19F: 5'-CATCAACAAGTTCTCATTACAG-3'

qN19R: 5'-ATCTCCTACGGCTTACAG-3'

**prisilkin-39:**

qP39F: 5'-CTGGAATGAGAGGATATG-3'

qP39R: 5'-TGCTGCTGTAATAACTATA-3'

**aspein:**

qAF: 5'-TGATAGTGAAGACGATGA-3'

qAR: 5'-RTGTCATCATCATCATCATC-3'

**prismalin-14:**

qP14F: 5'-TAAGACCATTCTACGGCTAT-3'

qP14R: 5'-ACCATATCCTCCATATAATCCT-3'

 **$\beta$ -actin:**

q $\beta$ -actin-f: 5'-CTCCTCACTGAAGCCCCCTCA-3'

q $\beta$ -actin-r: 5'-ATGGCTGGAATAGGGATTCTGG-3'
